# Supplementary material for: Genetic Variation in CYP2D6 and SLC22A1 Affects Amlodipine Pharmacokinetics and Safety
Source: MDPI journal article supplement (doi:10.3390/pharmaceutics15020404), 2023-01-25
Supplement: s1 [file s1]

## **Genetic variation in CYP2D6 and SLC22A1 affects amlodipine pharmacokinetics and safety.**

**Paula Soria-Chacartegui<sup>1</sup>, Pablo Zubiaur<sup>1,2\*</sup>, Dolores Ochoa<sup>1</sup>, Gonzalo Villapalos-García<sup>1</sup>, Manuel Román<sup>1</sup>, Miriam Matas<sup>1</sup>, Laura Figueiredo-Tor<sup>1</sup>, Gina Mejia-Abril<sup>1</sup>, Sofía Calleja<sup>1,3</sup>, Alejandro de Miguel<sup>1</sup>, Marcos Navares-Gómez<sup>1</sup>, Samuel Martín-Vilchez<sup>1</sup>, Francisco Abad-Santos<sup>1,4\*</sup>.**

<sup>1</sup>Clinical Pharmacology Department, Hospital Universitario de La Princesa, Instituto Teófilo Hernando, Universidad Autónoma de Madrid (UAM), Instituto de Investigación Sanitaria La Princesa (IP), Madrid, Spain.

<sup>2</sup>Division of Clinical Pharmacology, Toxicology and Therapeutic Innovation, Children's Mercy Research Institute, Kansas City, MO, United States.

<sup>3</sup>Servicio de Bioquímica Clínica, Clínica Universidad de Navarra, Pamplona, Spain.

<sup>4</sup>Centro de Investigación Biomédica en Red de Enfermedades Hepáticas y Digestivas (CIBERehd), Instituto de Salud Carlos III, Madrid, Spain

### **\* Correspondence:**

Pablo Zubiaur Precioso, PhD.  
Clinical Pharmacology Department,  
Hospital Universitario de La Princesa  
C/ Diego de León, 62. 28006 Madrid, Spain  
Tel: 34 915202425; Fax: 34 915202540.  
E-mail: [pablo.zubiaur@salud.madrid.org](mailto:pablo.zubiaur@salud.madrid.org)

Francisco Abad Santos, PhD, MD.  
Clinical Pharmacology Department,  
Hospital Universitario de La Princesa  
C/ Diego de León, 62. 28006 Madrid, Spain  
Tel: 34 915202425; Fax: 34 915202540  
E-mail: [francisco.abad@uam.es](mailto:francisco.abad@uam.es)

### **Supplementary material**

Table S1. Pharmacokinetic characteristics regarding genotypes or phenotypes in the exploratory step.

| Genotype or Phenotype          | N  | AUC <sub>72</sub> /DW<br>(h*ng*kg/ml*mg) | C <sub>max</sub> /DW<br>(ng*kg/ml*mg) | t <sub>max</sub> (h)      | t <sub>1/2</sub> (h)             |
|--------------------------------|----|------------------------------------------|---------------------------------------|---------------------------|----------------------------------|
| <b><i>ABCB1</i> rs1128503</b>  |    |                                          |                                       |                           |                                  |
| CC                             | 29 | 2131.54 (466.17)                         | 65.52 (13.07)                         | 6.19 (1.49)               | 35.07 (6.15)                     |
| CT                             | 24 | 2104.83 (461.10)                         | 62.57 (11.58)                         | 6.27 (1.44)               | 35.91 (7.94)                     |
| TT                             | 16 | 2189.45 (362.13)                         | 66.53 (10.77)                         | 5.75 (1.25)               | 35.36 (4.90)                     |
| <b><i>ABCB1</i> rs1045642</b>  |    |                                          |                                       |                           |                                  |
| CC                             | 25 | 2149.19 (495.14)                         | 64.43 (14.10)                         | 6.18 (1.50)               | 35.07 (6.19)                     |
| CT                             | 26 | 2156.73 (433.74)                         | 66.02 (10.19)                         | 5.96 (1.17)               | 36.59 (7.80)                     |
| TT                             | 18 | 2086.51 (372.93)                         | 63.27 (11.75)                         | 6.25 (1.67)               | 34.25 (4.71)                     |
| <b><i>ABCC2</i> rs2273697</b>  |    |                                          |                                       |                           |                                  |
| GG                             | 48 | 2103.45 (374.26)                         | 64.81 (10.94)                         | 6.13 (1.40)               | 35.63 (5.73)                     |
| GA + AA                        | 20 | 2224.49 (569.74)                         | 64.91 (14.71)                         | 6.05 (1.52)               | 35.24 (8.27)                     |
| <b><i>ABCG2</i> rs2231142</b>  |    |                                          |                                       |                           |                                  |
| NM                             | 51 | 2130.59 (454.33)                         | 64.75 (12.20)                         | 6.08 (1.39)               | 35.76 (7.01)                     |
| IM                             | 18 | 2150.09 (397.45)                         | 64.67 (11.77)                         | 6.22 (1.54)               | 34.49 (4.85)                     |
| <b><i>CYP1A2</i> rs2470890</b> |    |                                          |                                       |                           |                                  |
| T/T                            | 14 | 2023.67 (449.10)                         | 60.96 (12.45)                         | 5.89 (1.38)               | 34.58 (9.99)                     |
| T/C                            | 41 | 2122.74 (437.44)                         | 65.39 (11.09)                         | 6.06 (1.41)               | 35.69 (5.45)                     |
| C/C                            | 14 | 2285.58 (414.91)                         | 66.55 (14.12)                         | 6.50 (1.51)               | 35.52 (5.40)                     |
| <b><i>CYP1A2</i> rs2069514</b> |    |                                          |                                       |                           |                                  |
| G/G                            | 56 | 2134.74 (456.07)                         | 64.66 (12.15)                         | 6.04 (1.49)               | 35.40 (7.00)                     |
| G/A                            | 9  | 2080.78 (305.59)                         | 63.11 (7.98)                          | 6.50 (1.20)               | 36.50 (3.37)                     |
| A/A                            | 4  | 2272.35 (490.81)                         | 69.26 (18.84)                         | 6.38 (0.48)               | 33.39 (4.48)                     |
| <b><i>CYP1A2</i> rs762551</b>  |    |                                          |                                       |                           |                                  |
| C/C                            | 30 | 2031.07 (400.04)                         | 62.21 (11.66)                         | 6.07 (1.47)               | 34.30 (7.40)                     |
| C/A                            | 35 | 2206.84 (444.21)                         | 66.90 (12.02)                         | 6.07 (1.35)               | 36.15 (5.69)                     |
| A/A                            | 4  | 2297.62 (591.81)                         | 64.56 (13.91)                         | 6.88 (1.75)               | 37.54 (6.22)                     |
| <b><i>CYP2A6</i></b>           |    |                                          |                                       |                           |                                  |
| *1/*1                          | 62 | 2135.29 (435.85)                         | 64.89 (12.49)                         | 6.08 (1.28)               | 35.41 (6.60)                     |
| *1/*9                          | 5  | 2258.10 (533.73)                         | 63.43 (6.99)                          | 7.3 (2.31)                | 36.88 (6.72)                     |
| *9/*9                          | 2  | 1841.65 (189.61)                         | 62.79 (7.78)                          | 4.25 (1.06)*              | 32.26 (3.32)                     |
| <b><i>CYP2B6</i></b>           |    |                                          |                                       |                           |                                  |
| RM                             | 18 | 2008.81 (336.16)                         | 65.39 (11.84)                         | 6.06 (1.32)* <sup>1</sup> | <u>32.29 (4.21)*<sup>2</sup></u> |
| NM                             | 20 | 2256.64 (467.49)                         | 66.95 (11.32)                         | 5.73 (1.59)* <sup>1</sup> | 36.93 (5.57)                     |
| IM                             | 23 | 2066.54 (494.47)                         | 60.64 (12.07)                         | 6.39 (1.49)               | 35.32 (6.94)                     |

|                           |    |                  |               |             |               |
|---------------------------|----|------------------|---------------|-------------|---------------|
| PM                        | 6  | 2321.79 (346.58) | 69.55 (14.83) | 6.5 (0.45)  | 39.03 (10.99) |
| <b>CYP2C19</b>            |    |                  |               |             |               |
| RM                        | 10 | 2253.59 (454.23) | 65.69 (17.42) | 6.75 (1.34) | 36.66 (4.68)  |
| NM                        | 37 | 2120.85 (439.17) | 64.57 (12.00) | 6.09 (1.50) | 35.65 (7.17)  |
| IM                        | 21 | 2102.90 (449.32) | 64.54 (9.66)  | 5.79 (1.24) | 34.54 (6.31)  |
| <b>CYP2C9</b>             |    |                  |               |             |               |
| NM                        | 44 | 2154.12 (472.71) | 64.78 (13.36) | 6.20 (1.37) | 36.15 (6.98)  |
| IM                        | 23 | 2117.12 (384.22) | 65.52 (9.27)  | 5.98 (1.56) | 34.31 (5.58)  |
| PM                        | 2  | 1943.24 (240.09) | 54.51 (6.61)  | 6.00 (1.41) | 32.38 (5.27)  |
| <b>CYP3A5</b>             |    |                  |               |             |               |
| NM                        | 2  | 2367.01 (439.75) | 72.06 (1.69)  | 5.50 (1.41) | 35.20 (5.30)  |
| IM                        | 11 | 2053.53 (549.79) | 59.55 (14.67) | 6.41 (2.01) | 33.36 (5.73)  |
| PM                        | 56 | 2143.55 (418.18) | 65.48 (11.45) | 6.08 (1.30) | 35.84 (6.70)  |
| <b>SLC22A1 rs72552763</b> |    |                  |               |             |               |
| GAT/GAT                   | 44 | 2096.33 (423.33) | 63.48 (11.31) | 5.92 (1.41) | 35.03 (6.20)  |
| GAT/-                     | 23 | 2232.01 (466.44) | 67.89 (12.95) | 6.30 (1.30) | 35.98 (7.34)  |
| -/-                       | 2  | 1893.50 (345.62) | 55.84 (12.02) | 8.25 (1.77) | 37.77 (4.22)  |
| <b>SLC22A1 rs12208357</b> |    |                  |               |             |               |
| C/C                       | 63 | 2162.95 (438.89) | 65.18 (12.17) | 6.14 (1.44) | 35.58 (6.71)  |
| C/T + T/T                 | 6  | 1849.32 (325.34) | 59.93 (9.66)  | 5.83 (1.21) | 33.85 (3.88)  |
| <b>SLCO1B1</b>            |    |                  |               |             |               |
| Normal function (NF)      | 56 | 2150.83 (436.30) | 65.14 (11.85) | 6.23 (1.35) | 35.92 (6.42)  |
| Decreased function (DF)   | 11 | 2025.92 (469.48) | 61.57 (13.70) | 5.41 (1.73) | 32.75 (6.89)  |
| Poor function (PF)        | 2  | 2314.94 (357.10) | 70.62 (0.36)  | 6.75 (0.35) | 36.26(6.79)   |
| <b>UGT1A1</b>             |    |                  |               |             |               |
| NM                        | 30 | 2184.19 (511.07) | 65.03 (13.03) | 6.37 (1.66) | 36.89 (7.58)  |
| IM                        | 35 | 2074.46 (382.75) | 63.27 (10.91) | 5.93 (1.22) | 34.26 (5.57)  |
| PM                        | 4  | 2307.48 (212.81) | 75.17 (10.18) | 5.88 (0.95) | 34.67 (3.83)  |
| <b>CYP2C8</b>             |    |                  |               |             |               |
| RM + UM                   | 15 | 2182.61 (424.83) | 64.46 (10.22) | 6.50 (1.21) | 35.20 (6.41)  |
| NM                        | 40 | 2095.00 (429.85) | 64.59 (13.61) | 6.09 (1.54) | 35.47 (6.72)  |
| PM + IM                   | 11 | 2287.72 (506.18) | 67.12 (9.57)  | 6.14 (0.87) | 36.46 (6.88)  |

No genetic information was available for 1 volunteer, as no sample could be recovered. The total number of volunteers for some genes is lower than 69 due to errors in the genotyping technique.
